# Supplementary material for: Knockdown of PVT1 inhibits cell proliferation in luminal and basal-like breast cancer subtypes by activating LATS2/Hippo signaling pathway
Source: Research Square preprint supplement (doi:10.21203/rs.3.rs-5745151/v1), 2025-04-09
Supplement: Supplementary file 1 [file f132d1b3a259fca58c5226cb.docx]

**Supplementary table 1. Clinical characteristics of luminal and basal like BC patients in the TCGA cohort**

| **Clinical characteristic** | **Number of cases (%)** | |
| --- | --- | --- |
| **Luminal (n=683)** | **Basal like (n=169)** |
| Age (years) |  |  |
| < 60 | 344 (50.37) | 110 (65.09) |
| ≥ 60 | 339 (49.63) | 59 (34.91) |
| T classification |  |  |
| T1 | 193 (28.26) | 32 (18.93) |
| T2 | 385 (56.37) | 115 (68.05) |
| T3 | 77 (11.27) | 16 (9.47) |
| T4 | 26 (3.81) | 3 (1.78) |
| Unknown | 2 (0.29) | 3 (1.78) |
| N classification |  |  |
| N0 | 308 (45.10) | 104 (61.54) |
| N1 | 233 (34.11) | 45 (26.63) |
| N2 | 84 (12.30) | 11 (6.51) |
| N3 | 44 (6.44) | 5 (2.96) |
| Unknown | 14 (2.05) | 4 (2.37) |
| Metastasis |  |  |
| M0 | 566 (82.87) | 145 (85.80) |
| M1 | 12 (1.76) | 3 (1.78) |
| Unknown | 105 (15.37) | 21 (12.43) |
| TNM stage |  |  |
| I | 130 (19.03) | 22 (13.02) |
| II | 368 (53.88) | 122 (72.19) |
| III | 162 (23.72) | 20 (11.83) |
| IV | 11 (1.61) | 2 (1.18) |
| Unknown | 12 (1.76) | 3 (1.78) |
| Vital status |  |  |
| Alive | 595 (87.12) | 147 (86.98) |
| Dead | 88 (12.88) | 22 (13.02) |

Abbreviations: T, tumor; N, lymph node; M, metastasis; n, number.

**Supplementary table 2. Common up-regulated and down-regulated lncRNAs in both luminal and basal like BC patients of the TCGA cohort**

| **Category** | **Gene symbol** |
| --- | --- |
| Up-regulated  (717 genes) | *C10orf91 C10orf95 C15orf54 C17orf102 C2orf48 C6orf99 CDKN2B-AS1 CLRN1-AS1 DLEU2 EHMT1-IT1 ENSG00000176912 ENSG00000188280 ENSG00000188477 ENSG00000196979 ENSG00000203288 ENSG00000203362 ENSG00000203585 ENSG00000204044 ENSG00000204791 ENSG00000204832 ENSG00000204949 ENSG00000205537 ENSG00000205559 ENSG00000205628 ENSG00000205634 ENSG00000214039 ENSG00000214145 ENSG00000214725 ENSG00000214888 ENSG00000219159 ENSG00000220891 ENSG00000222007 ENSG00000222017 ENSG00000222022 ENSG00000222032 ENSG00000223485 ENSG00000223486 ENSG00000223669 ENSG00000223715 ENSG00000223729 ENSG00000223882 ENSG00000224050 ENSG00000224141 ENSG00000224243 ENSG00000224269 ENSG00000224271 ENSG00000224272 ENSG00000224535 ENSG00000224638 ENSG00000224675 ENSG00000224733 ENSG00000224790 ENSG00000224875 ENSG00000224885 ENSG00000224899 ENSG00000224963 ENSG00000224973 ENSG00000225007 ENSG00000225107 ENSG00000225166 ENSG00000225173 ENSG00000225255 ENSG00000225300 ENSG00000225489 ENSG00000225518 ENSG00000225532 ENSG00000225548 ENSG00000225656 ENSG00000225675 ENSG00000225742 ENSG00000225745 ENSG00000225768 ENSG00000226004 ENSG00000226012 ENSG00000226087 ENSG00000226320 ENSG00000226363 ENSG00000226453 ENSG00000226533 ENSG00000226598 ENSG00000226627 ENSG00000226644 ENSG00000226690 ENSG00000226738 ENSG00000226779 ENSG00000226806 ENSG00000226812 ENSG00000226828 ENSG00000226890 ENSG00000226913 ENSG00000226957 ENSG00000226969 ENSG00000227045 ENSG00000227066 ENSG00000227145 ENSG00000227170 ENSG00000227195 ENSG00000227213 ENSG00000227237 ENSG00000227279 ENSG00000227392 ENSG00000227589 ENSG00000227674 ENSG00000227773 ENSG00000227857 ENSG00000227925 ENSG00000227964 ENSG00000228044 ENSG00000228216 ENSG00000228288 ENSG00000228318 ENSG00000228496 ENSG00000228559 ENSG00000228634 ENSG00000228651 ENSG00000228705 ENSG00000228714 ENSG00000228734 ENSG00000228792 ENSG00000228918 ENSG00000228933 ENSG00000229178 ENSG00000229373 ENSG00000229404 ENSG00000229512 ENSG00000229520 ENSG00000229531 ENSG00000229720 ENSG00000229780 ENSG00000229876 ENSG00000229950 ENSG00000229960 ENSG00000229970 ENSG00000229983 ENSG00000230005 ENSG00000230033 ENSG00000230096 ENSG00000230107 ENSG00000230316 ENSG00000230345 ENSG00000230400 ENSG00000230432 ENSG00000230433 ENSG00000230479 ENSG00000230498 ENSG00000230526 ENSG00000230615 ENSG00000230628 ENSG00000230699 ENSG00000230798 ENSG00000230826 ENSG00000230836 ENSG00000230838 ENSG00000231054 ENSG00000231057 ENSG00000231073 ENSG00000231081 ENSG00000231131 ENSG00000231150 ENSG00000231196 ENSG00000231233 ENSG00000231310 ENSG00000231324 ENSG00000231407 ENSG00000231483 ENSG00000231612 ENSG00000231705 ENSG00000231776 ENSG00000231806 ENSG00000231898 ENSG00000231903 ENSG00000232021 ENSG00000232034 ENSG00000232044 ENSG00000232065 ENSG00000232093 ENSG00000232192 ENSG00000232445 ENSG00000232461 ENSG00000232536 ENSG00000232600 ENSG00000232671 ENSG00000232677 ENSG00000232679 ENSG00000233017 ENSG00000233030 ENSG00000233203 ENSG00000233338 ENSG00000233461 ENSG00000233491 ENSG00000233515 ENSG00000233532 ENSG00000233539 ENSG00000233542 ENSG00000233577 ENSG00000233589 ENSG00000233682 ENSG00000233693 ENSG00000233791 ENSG00000233818 ENSG00000233854 ENSG00000233930 ENSG00000233975 ENSG00000234142 ENSG00000234174 ENSG00000234191 ENSG00000234264 ENSG00000234323 ENSG00000234493 ENSG00000234678 ENSG00000234703 ENSG00000234722 ENSG00000234915 ENSG00000234996 ENSG00000235021 ENSG00000235026 ENSG00000235027 ENSG00000235029 ENSG00000235052 ENSG00000235086 ENSG00000235096 ENSG00000235142 ENSG00000235214 ENSG00000235277 ENSG00000235304 ENSG00000235385 ENSG00000235526 ENSG00000235529 ENSG00000235669 ENSG00000235740 ENSG00000235770 ENSG00000235834 ENSG00000236069 ENSG00000236081 ENSG00000236206 ENSG00000236262 ENSG00000236318 ENSG00000236347 ENSG00000236366 ENSG00000236385 ENSG00000236449 ENSG00000236452 ENSG00000236481 ENSG00000236535 ENSG00000236591 ENSG00000236651 ENSG00000236663 ENSG00000236846 ENSG00000236924 ENSG00000236947 ENSG00000237101 ENSG00000237224 ENSG00000237265 ENSG00000237372 ENSG00000237423 ENSG00000237457 ENSG00000237512 ENSG00000237525 ENSG00000237567 ENSG00000237588 ENSG00000237594 ENSG00000237605 ENSG00000237853 ENSG00000237864 ENSG00000237978 ENSG00000238042 ENSG00000238107 ENSG00000238129 ENSG00000238171 ENSG00000238250 ENSG00000240086 ENSG00000240350 ENSG00000241818 ENSG00000242021 ENSG00000242048 ENSG00000242078 ENSG00000242094 ENSG00000242136 ENSG00000242147 ENSG00000242290 ENSG00000242396 ENSG00000242440 ENSG00000242512 ENSG00000242540 ENSG00000244040 ENSG00000244502 ENSG00000244564 ENSG00000244649 ENSG00000245080 ENSG00000245149 ENSG00000245614 ENSG00000245832 ENSG00000246095 ENSG00000246465 ENSG00000246876 ENSG00000248131 ENSG00000248238 ENSG00000248243 ENSG00000248596 ENSG00000248685 ENSG00000248693 ENSG00000248859 ENSG00000248870 ENSG00000248964 ENSG00000248968 ENSG00000249001 ENSG00000249082 ENSG00000249395 ENSG00000249406 ENSG00000249413 ENSG00000249550 ENSG00000249602 ENSG00000249734 ENSG00000249896 ENSG00000249916 ENSG00000249917 ENSG00000250033 ENSG00000250081 ENSG00000250102 ENSG00000250133 ENSG00000250166 ENSG00000250274 ENSG00000250546 ENSG00000250682 ENSG00000250874 ENSG00000250891 ENSG00000251026 ENSG00000251138 ENSG00000251144 ENSG00000251151 ENSG00000251171 ENSG00000251350 ENSG00000251365 ENSG00000251442 ENSG00000251459 ENSG00000251517 ENSG00000251533 ENSG00000251538 ENSG00000251604 ENSG00000253161 ENSG00000253174 ENSG00000253210 ENSG00000253227 ENSG00000253284 ENSG00000253301 ENSG00000253372 ENSG00000253395 ENSG00000253396 ENSG00000253477 ENSG00000253490 ENSG00000253554 ENSG00000253616 ENSG00000253633 ENSG00000253642 ENSG00000253658 ENSG00000253666 ENSG00000253669 ENSG00000253746 ENSG00000253802 ENSG00000253821 ENSG00000253824 ENSG00000253898 ENSG00000253931 ENSG00000253972 ENSG00000254084 ENSG00000254101 ENSG00000254142 ENSG00000254205 ENSG00000254208 ENSG00000254233 ENSG00000254248 ENSG00000254286 ENSG00000254287 ENSG00000254337 ENSG00000254338 ENSG00000254538 ENSG00000254548 ENSG00000254654 ENSG00000254879 ENSG00000254973 ENSG00000255050 ENSG00000255160 ENSG00000255224 ENSG00000255257 ENSG00000255345 ENSG00000255433 ENSG00000255521 ENSG00000255921 ENSG00000256025 ENSG00000256039 ENSG00000256196 ENSG00000256262 ENSG00000256571 ENSG00000256802 ENSG00000256940 ENSG00000256955 ENSG00000256982 ENSG00000257086 ENSG00000257137 ENSG00000257167 ENSG00000257191 ENSG00000257596 ENSG00000257636 ENSG00000257842 ENSG00000257869 ENSG00000257924 ENSG00000258010 ENSG00000258314 ENSG00000258331 ENSG00000258435 ENSG00000258752 ENSG00000258791 ENSG00000258815 ENSG00000258884 ENSG00000258927 ENSG00000259001 ENSG00000259054 ENSG00000259153 ENSG00000259175 ENSG00000259264 ENSG00000259439 ENSG00000259485 ENSG00000259495 ENSG00000259518 ENSG00000259598 ENSG00000259647 ENSG00000259786 ENSG00000259798 ENSG00000259807 ENSG00000259954 ENSG00000260088 ENSG00000260132 ENSG00000260135 ENSG00000260167 ENSG00000260193 ENSG00000260196 ENSG00000260249 ENSG00000260289 ENSG00000260442 ENSG00000260454 ENSG00000260695 ENSG00000260757 ENSG00000260777 ENSG00000260792 ENSG00000260899 ENSG00000260920 ENSG00000260936 ENSG00000260976 ENSG00000261039 ENSG00000261040 ENSG00000261061 ENSG00000261104 ENSG00000261159 ENSG00000261220 ENSG00000261266 ENSG00000261327 ENSG00000261347 ENSG00000261409 ENSG00000261426 ENSG00000261431 ENSG00000261437 ENSG00000261442 ENSG00000261481 ENSG00000261654 ENSG00000261693 ENSG00000261716 ENSG00000261742 ENSG00000261758 ENSG00000261762 ENSG00000261924 ENSG00000262117 ENSG00000262152 ENSG00000262172 ENSG00000262188 ENSG00000262362 ENSG00000262585 ENSG00000262703 ENSG00000262966 ENSG00000262979 ENSG00000263080 ENSG00000263082 ENSG00000263146 ENSG00000263499 ENSG00000263501 ENSG00000263655 ENSG00000263724 ENSG00000263727 ENSG00000263745 ENSG00000263786 ENSG00000263893 ENSG00000264647 ENSG00000264734 ENSG00000264853 ENSG00000264895 ENSG00000265393 ENSG00000265415 ENSG00000265579 ENSG00000265728 ENSG00000265800 ENSG00000265933 ENSG00000265962 ENSG00000266126 ENSG00000266289 ENSG00000266371 ENSG00000266402 ENSG00000266445 ENSG00000266446 ENSG00000266598 ENSG00000266602 ENSG00000266830 ENSG00000266869 ENSG00000266924 ENSG00000266965 ENSG00000266970 ENSG00000266975 ENSG00000267013 ENSG00000267077 ENSG00000267095 ENSG00000267123 ENSG00000267136 ENSG00000267147 ENSG00000267201 ENSG00000267260 ENSG00000267366 ENSG00000267374 ENSG00000267393 ENSG00000267409 ENSG00000267432 ENSG00000267476 ENSG00000267503 ENSG00000267512 ENSG00000267529 ENSG00000267577 ENSG00000267654 ENSG00000267694 ENSG00000267702 ENSG00000267751 ENSG00000267886 ENSG00000267943 ENSG00000268262 ENSG00000268635 ENSG00000268658 ENSG00000268686 ENSG00000268764 ENSG00000268941 ENSG00000269125 ENSG00000269139 ENSG00000269189 ENSG00000269275 ENSG00000269397 ENSG00000269416 ENSG00000269489 ENSG00000269621 ENSG00000269729 ENSG00000269806 ENSG00000269814 ENSG00000269900 ENSG00000269924 ENSG00000269959 ENSG00000269974 ENSG00000270097 ENSG00000270120 ENSG00000270137 ENSG00000270168 ENSG00000270174 ENSG00000270178 ENSG00000270372 ENSG00000270460 ENSG00000270816 ENSG00000270977 ENSG00000271204 ENSG00000271216 ENSG00000271771 ENSG00000271784 ENSG00000271824 ENSG00000271830 ENSG00000271855 ENSG00000271917 ENSG00000271936 ENSG00000271969 ENSG00000272046 ENSG00000272071 ENSG00000272079 ENSG00000272115 ENSG00000272202 ENSG00000272205 ENSG00000272219 ENSG00000272235 ENSG00000272328 ENSG00000272406 ENSG00000272438 ENSG00000272468 ENSG00000272524 ENSG00000272563 ENSG00000272583 ENSG00000272662 ENSG00000272666 ENSG00000272702 ENSG00000272746 ENSG00000272763 ENSG00000272768 ENSG00000272788 ENSG00000272906 ENSG00000272948 ENSG00000272954 ENSG00000272989 ENSG00000273002 ENSG00000273108 ENSG00000273132 ENSG00000273162 ENSG00000273237 ENSG00000273248 ENSG00000273267 ENSG00000273272 ENSG00000273319 ENSG00000273391 ENSG00000273415 ENSG00000273445 ENSG00000273481 ENSG00000273615 ENSG00000273619 ENSG00000273786 ENSG00000273792 ENSG00000273812 ENSG00000273821 ENSG00000273980 ENSG00000274038 ENSG00000274213 ENSG00000274270 ENSG00000274367 ENSG00000274373 ENSG00000274425 ENSG00000274508 ENSG00000274718 ENSG00000274825 ENSG00000274827 ENSG00000274849 ENSG00000275092 ENSG00000275223 ENSG00000275437 ENSG00000275479 ENSG00000275576 ENSG00000275966 ENSG00000276255 ENSG00000276272 ENSG00000276509 ENSG00000276923 ENSG00000277200 ENSG00000277268 ENSG00000277383 ENSG00000277581 ENSG00000277602 ENSG00000277619 ENSG00000277693 ENSG00000278041 ENSG00000278630 ENSG00000278709 ENSG00000278716 ENSG00000278743 ENSG00000279184 ENSG00000279424 ENSG00000279494 ENSG00000279623 ENSG00000279712 ENSG00000279888 ENSG00000280413 ENSG00000280721 ENSG00000281181 FAM230C FAM83H-AS1* *HOTAIR HOTTIP KIF25-AS1 LINC00052 LINC00158 LINC00176 LINC00200 LINC00202-1 LINC00261 LINC00337 LINC00461 LINC00466 LINC00473 LINC00511 LINC00614 LINC00896 LINC01555 LINC01556 LINC01561 LINC01588 MAFG-AS1 MALAT1 MIR155HG MIR181A1HG MIR210HG MIR3180-1 MKRN3-AS1 MNX1-AS1 MUC2 MYCNOS* ***PVT1*** *RBAKDN RHPN1-AS1 RP11-110I1.6 RP11-654C22.2 RP11-6N13.1 SAMD12-AS1 SHANK2-AS3 SIX3-AS1 SND1-IT1 ST3GAL4-AS1 TCL6* *TINCR UCA1 UMODL1-AS1 WT1-AS ZNF252P-AS1* |
| Down-  regulated  (533 genes) | *ADIRF-AS1 C20orf166-AS1 C5orf64 C6orf3 DIO3OS EIF1B-AS1 EMX2OS ENSG00000151303 ENSG00000175967 ENSG00000177133 ENSG00000177822 ENSG00000179428 ENSG00000180139 ENSG00000183154 ENSG00000186148 ENSG00000186369 ENSG00000188525 ENSG00000198547 ENSG00000203356 ENSG00000205037 ENSG00000205106 ENSG00000205231 ENSG00000205562 ENSG00000206567 ENSG00000213373 ENSG00000213904 ENSG00000215483 ENSG00000221571 ENSG00000223382 ENSG00000223401 ENSG00000223458 ENSG00000223678 ENSG00000223704 ENSG00000224204 ENSG00000224238 ENSG00000224239 ENSG00000224307 ENSG00000224318 ENSG00000224468 ENSG00000224525 ENSG00000224568 ENSG00000224609 ENSG00000224613 ENSG00000224713 ENSG00000224743 ENSG00000224957 ENSG00000224958 ENSG00000225028 ENSG00000225039 ENSG00000225057 ENSG00000225328 ENSG00000225399 ENSG00000225670 ENSG00000225731 ENSG00000225873 ENSG00000225914 ENSG00000225938 ENSG00000226005 ENSG00000226009 ENSG00000226237 ENSG00000226239 ENSG00000226252 ENSG00000226482 ENSG00000226530 ENSG00000226622 ENSG00000226808 ENSG00000226833 ENSG00000226849 ENSG00000226871 ENSG00000226891 ENSG00000227082 ENSG00000227117 ENSG00000227260 ENSG00000227467 ENSG00000227508 ENSG00000227544 ENSG00000227591 ENSG00000228035 ENSG00000228139 ENSG00000228162 ENSG00000228290 ENSG00000228401 ENSG00000228495 ENSG00000228528 ENSG00000228536 ENSG00000228692 ENSG00000228791 ENSG00000228798 ENSG00000228971 ENSG00000229019 ENSG00000229108 ENSG00000229246 ENSG00000229312 ENSG00000229484 ENSG00000229491 ENSG00000229498 ENSG00000229558 ENSG00000229694 ENSG00000229771 ENSG00000230058 ENSG00000230303 ENSG00000230333 ENSG00000230435 ENSG00000230587 ENSG00000230747 ENSG00000230910 ENSG00000230918 ENSG00000230943 ENSG00000231013 ENSG00000231024 ENSG00000231121 ENSG00000231160 ENSG00000231170 ENSG00000231246 ENSG00000231638 ENSG00000231682 ENSG00000231943 ENSG00000231948 ENSG00000232057 ENSG00000232079 ENSG00000232284 ENSG00000232316 ENSG00000232377 ENSG00000232606 ENSG00000232759 ENSG00000232821 ENSG00000233117 ENSG00000233554 ENSG00000233569 ENSG00000233766 ENSG00000233817 ENSG00000233858 ENSG00000234076 ENSG00000234292 ENSG00000234336 ENSG00000234456 ENSG00000234471 ENSG00000234509 ENSG00000234577 ENSG00000234661 ENSG00000234754 ENSG00000234840 ENSG00000234884 ENSG00000234944 ENSG00000234961 ENSG00000235007 ENSG00000235033 ENSG00000235172 ENSG00000235427 ENSG00000235434 ENSG00000235782 ENSG00000235875 ENSG00000235904 ENSG00000236036 ENSG00000236304 ENSG00000236333 ENSG00000236501 ENSG00000236700 ENSG00000236711 ENSG00000236849 ENSG00000236914 ENSG00000236915 ENSG00000237125 ENSG00000237159 ENSG00000237234 ENSG00000237419 ENSG00000237531 ENSG00000237813 ENSG00000237949 ENSG00000237975 ENSG00000238018 ENSG00000238078 ENSG00000238099 ENSG00000238120 ENSG00000239828 ENSG00000240292 ENSG00000240666 ENSG00000241158 ENSG00000241479 ENSG00000241684 ENSG00000241720 ENSG00000242268 ENSG00000242317 ENSG00000242611 ENSG00000243018 ENSG00000243836 ENSG00000243953 ENSG00000243961 ENSG00000244227 ENSG00000244953 ENSG00000244968 ENSG00000245025 ENSG00000245812 ENSG00000246022 ENSG00000246430 ENSG00000246523 ENSG00000246774 ENSG00000246898 ENSG00000247287 ENSG00000247970 ENSG00000248202 ENSG00000248309 ENSG00000248441 ENSG00000248576 ENSG00000248668 ENSG00000248698 ENSG00000248869 ENSG00000248890 ENSG00000248896 ENSG00000249173 ENSG00000249201 ENSG00000249307 ENSG00000249365 ENSG00000249378 ENSG00000249487 ENSG00000249574 ENSG00000249742 ENSG00000249752 ENSG00000249797 ENSG00000249906 ENSG00000249923 ENSG00000249955 ENSG00000250048 ENSG00000250073 ENSG00000250208 ENSG00000250240 ENSG00000250282 ENSG00000250331 ENSG00000250334 ENSG00000250343 ENSG00000250538 ENSG00000250602 ENSG00000250685 ENSG00000250748 ENSG00000250934 ENSG00000250961 ENSG00000250969 ENSG00000250971 ENSG00000251189 ENSG00000251257 ENSG00000251323 ENSG00000251399 ENSG00000251448 ENSG00000251450 ENSG00000251576 ENSG00000253105 ENSG00000253177 ENSG00000253295 ENSG00000253389 ENSG00000253434 ENSG00000253474 ENSG00000253608 ENSG00000253647 ENSG00000253686 ENSG00000253688 ENSG00000253829 ENSG00000253853 ENSG00000254041 ENSG00000254109 ENSG00000254135 ENSG00000254139 ENSG00000254211 ENSG00000254254 ENSG00000254404 ENSG00000254414 ENSG00000254528 ENSG00000254532 ENSG00000254703 ENSG00000254744 ENSG00000254847 ENSG00000254862 ENSG00000254952 ENSG00000254991 ENSG00000255021 ENSG00000255045 ENSG00000255084 ENSG00000255176 ENSG00000255191 ENSG00000255216 ENSG00000255248 ENSG00000255310 ENSG00000255328 ENSG00000255471 ENSG00000255479 ENSG00000255545 ENSG00000255648 ENSG00000255652 ENSG00000255850 ENSG00000255864 ENSG00000255920 ENSG00000256164 ENSG00000256249 ENSG00000256508 ENSG00000256654 ENSG00000256757 ENSG00000256790 ENSG00000257219 ENSG00000257252 ENSG00000257259 ENSG00000257327 ENSG00000257456 ENSG00000257551 ENSG00000257595 ENSG00000257647 ENSG00000258168 ENSG00000258231 ENSG00000258441 ENSG00000258461 ENSG00000258479 ENSG00000258545 ENSG00000258572 ENSG00000258586 ENSG00000258603 ENSG00000258636 ENSG00000258789 ENSG00000258819 ENSG00000258926 ENSG00000258942 ENSG00000258987 ENSG00000259134 ENSG00000259188 ENSG00000259244 ENSG00000259347 ENSG00000259407 ENSG00000259430 ENSG00000259448 ENSG00000259658 ENSG00000259664 ENSG00000259687 ENSG00000259744 ENSG00000259791 ENSG00000259883 ENSG00000259884 ENSG00000259887 ENSG00000259920 ENSG00000259969 ENSG00000260102 ENSG00000260271 ENSG00000260306 ENSG00000260398 ENSG00000260578 ENSG00000260633 ENSG00000260693 ENSG00000260761 ENSG00000260802 ENSG00000260878 ENSG00000260895 ENSG00000260940 ENSG00000260947 ENSG00000261026 ENSG00000261054 ENSG00000261064 ENSG00000261269 ENSG00000261295 ENSG00000261390 ENSG00000261399 ENSG00000261468 ENSG00000261472 ENSG00000261496 ENSG00000261586 ENSG00000261616 ENSG00000261625 ENSG00000261672 ENSG00000261707 ENSG00000261737 ENSG00000261997 ENSG00000262006 ENSG00000262097 ENSG00000262115 ENSG00000262179 ENSG00000262370 ENSG00000262454 ENSG00000262898 ENSG00000263065 ENSG00000263257 ENSG00000263293 ENSG00000263508 ENSG00000263586 ENSG00000264016 ENSG00000264345 ENSG00000264727 ENSG00000264968 ENSG00000265374 ENSG00000265413 ENSG00000265554 ENSG00000265799 ENSG00000266176 ENSG00000266601 ENSG00000266988 ENSG00000267069 ENSG00000267082 ENSG00000267097 ENSG00000267107 ENSG00000267122 ENSG00000267131 ENSG00000267194 ENSG00000267272 ENSG00000267299 ENSG00000267325 ENSG00000267328 ENSG00000267339 ENSG00000267405 ENSG00000267505 ENSG00000267519 ENSG00000267543 ENSG00000267583 ENSG00000267603 ENSG00000267612 ENSG00000267653 ENSG00000267784 ENSG00000267904 ENSG00000268287 ENSG00000268798 ENSG00000269289 ENSG00000269736 ENSG00000269918 ENSG00000269929 ENSG00000269936 ENSG00000270016 ENSG00000270076 ENSG00000270077 ENSG00000270093 ENSG00000270412 ENSG00000270607 ENSG00000270792 ENSG00000270823 ENSG00000270953 ENSG00000271239 ENSG00000271334 ENSG00000271347 ENSG00000271390 ENSG00000271392 ENSG00000271474 ENSG00000271614 ENSG00000271880 ENSG00000271967 ENSG00000272123 ENSG00000272143 ENSG00000272180 ENSG00000272254 ENSG00000272316 ENSG00000272320 ENSG00000272411 ENSG00000272482 ENSG00000272491 ENSG00000272501 ENSG00000272506 ENSG00000272508 ENSG00000272511 ENSG00000272541 ENSG00000272564 ENSG00000272597 ENSG00000272777 ENSG00000272783 ENSG00000272784 ENSG00000272789 ENSG00000272823 ENSG00000272856 ENSG00000272914 ENSG00000273258 ENSG00000273348 ENSG00000273409 ENSG00000273771 ENSG00000273923 ENSG00000274021 ENSG00000274031 ENSG00000274080 ENSG00000274220 ENSG00000274312 ENSG00000274340 ENSG00000274818 ENSG00000275025 ENSG00000275088 ENSG00000275120 ENSG00000275149 ENSG00000275179 ENSG00000275392 ENSG00000275569 ENSG00000275612 ENSG00000275630 ENSG00000275830 ENSG00000276668 ENSG00000276724 ENSG00000276772 ENSG00000276778 ENSG00000277135 ENSG00000277214 ENSG00000277270 ENSG00000277427 ENSG00000277531 ENSG00000277631 ENSG00000277639 ENSG00000277684 ENSG00000277763 ENSG00000277851 ENSG00000277863 ENSG00000277954 ENSG00000278058 ENSG00000278727 ENSG00000279571 ENSG00000280241 ERICH1-AS1 FGF13-AS1 GRIK1-AS1* *HCG23 HOXA-AS2 HOXA-AS3 HOXB-AS1 LINC00086 LINC00211 LINC00264 LINC00548 LINC00636 LINC00670 LINC00891 LINC01230 LINC01550 LSINCT5 MEG3* *MEG9* *MESTIT1* *MIR100HG MIR143HG* *MIR205HG MIR22HG MIR497HG MIR99AHG PTENP1-AS RP11-31F15.2 RP11-494M8.4 TMEM220-AS1 WDFY3-AS2 ZEB2-AS1* |

**Supplementary table 3. Common differentially expressed lncRNAs significantly associated with TNM stage in luminal and basal like subtypes**

| **Subtype** | **Category** | **Gene symbol** |
| --- | --- | --- |
| Luminal | Up-regulated  (81 genes) | *CLRN1-AS1 ENSG00000223715 ENSG00000224243 ENSG00000224733 ENSG00000224885 ENSG00000225768 ENSG00000226806 ENSG00000226828 ENSG00000227279 ENSG00000228634 ENSG00000228705 ENSG00000229520 ENSG00000229960 ENSG00000230033 ENSG00000230096 ENSG00000230615 ENSG00000231057 ENSG00000231233 ENSG00000233203 ENSG00000233515 ENSG00000233577 ENSG00000234174 ENSG00000234722 ENSG00000236651 ENSG00000237457 ENSG00000237525 ENSG00000237567 ENSG00000238129 ENSG00000242048 ENSG00000248685 ENSG00000248859 ENSG00000249602 ENSG00000250102 ENSG00000250166 ENSG00000251026 ENSG00000251442 ENSG00000253174 ENSG00000253301 ENSG00000253616 ENSG00000254248 ENSG00000254286 ENSG00000254287 ENSG00000254879 ENSG00000255433 ENSG00000255521 ENSG00000257924 ENSG00000259054 ENSG00000259175 ENSG00000260167 ENSG00000260249 ENSG00000260899 ENSG00000261159 ENSG00000261220 ENSG00000261654 ENSG00000262585 ENSG00000266965 ENSG00000267077 ENSG00000267366 ENSG00000267694 ENSG00000268262 ENSG00000269489 ENSG00000269900 ENSG00000270137 ENSG00000271204 ENSG00000272046 ENSG00000272202 ENSG00000272468 ENSG00000272788 ENSG00000272989 ENSG00000273319 ENSG00000273415 ENSG00000274825 ENSG00000274849 ENSG00000276509 ENSG00000277693 ENSG00000278630 LINC00202-1 LINC00261 LINC00466* ***PVT1*** *SAMD12-AS1* |
| Down-regulated  (51 genes) | *ADIRF-AS1 EIF1B-AS1 ENSG00000198547 ENSG00000224525 ENSG00000224568 ENSG00000226482 ENSG00000226849 ENSG00000228791 ENSG00000229484 ENSG00000231121 ENSG00000232284 ENSG00000235782 ENSG00000236501 ENSG00000236915 ENSG00000237419 ENSG00000241479 ENSG00000242268 ENSG00000246774 ENSG00000247970 ENSG00000248890 ENSG00000249487 ENSG00000251448 ENSG00000253829 ENSG00000254211 ENSG00000254528 ENSG00000256757 ENSG00000258461 ENSG00000258545 ENSG00000259244 ENSG00000259791 ENSG00000259884 ENSG00000259887 ENSG00000261707 ENSG00000261737 ENSG00000264968 ENSG00000265799 ENSG00000267082 ENSG00000267122 ENSG00000267612 ENSG00000267904 ENSG00000269736 ENSG00000269929 ENSG00000272143 ENSG00000272491 ENSG00000272541 ENSG00000274021 ENSG00000274818 ENSG00000275025 ENSG00000275088 ENSG00000276772 GRIK1-AS1* |
| Basal like | Up-regulated  (32 genes) | *ENSG00000222032 ENSG00000224269 ENSG00000225255 ENSG00000225518 ENSG00000226969 ENSG00000230096 ENSG00000230699 ENSG00000231073 ENSG00000231705 ENSG00000231806 ENSG00000235096 ENSG00000237512 ENSG00000242290 ENSG00000244564 ENSG00000244649 ENSG00000248685 ENSG00000248964 ENSG00000249602 ENSG00000251459 ENSG00000253824 ENSG00000260088 ENSG00000261654 ENSG00000262703 ENSG00000263745 ENSG00000267095 ENSG00000267374 ENSG00000272763 ENSG00000272954 ENSG00000274373 ENSG00000275479 LINC00337 RBAKDN* |
| Down-regulated  (28 genes) | *ENSG00000188525 ENSG00000203356 ENSG00000215483 ENSG00000223678 ENSG00000224713 ENSG00000224957 ENSG00000227544 ENSG00000228401 ENSG00000235427 ENSG00000236036 ENSG00000237125 ENSG00000242611 ENSG00000248441 ENSG00000249906 ENSG00000250748 ENSG00000251189 ENSG00000251257 ENSG00000254135 ENSG00000254211 ENSG00000255471 ENSG00000259134 ENSG00000259188 ENSG00000261672 ENSG00000262097 ENSG00000263065 ENSG00000263508 ENSG00000272482 ENSG00000275830* |
